# Supplementary material
Source: Elsevier journal article supplement (https://www.sciencedirect.com/science/article/pii/S0034935612001740)
Supplement: mmc1 [file S0034935612001740:mmc1.pdf]

Anexo.

Procedimientos preoperatorios y anestesia de los animales.

Para la ventilación se tuvo en cuenta que el volumen compresible de las tubuladuras medido era despreciable por tener una distensibilidad mínima ( $<0,2$  ml/cmH<sub>2</sub>O). Además se calculó el espacio muerto tras la “Y” por los sensores de flujo, que fue de 28 ml, y el cálculo del volumen corriente se hizo teniendo en cuenta dicho espacio muerto.

El respirador utilizado (Temel Supra, Valencia, España) tiene una compliance interna de  $0,13 \pm 0,01$  ml/cmH<sub>2</sub>O para cualquiera de sus modalidades ventilatorias, con una rigidez importante del circuito interno, y un volumen interno equivalente a 130 ml. Dicho respirador en el análisis de Company *et al*<sup>1</sup> tenía como aspectos principales la posibilidad de usar circuitos abiertos, bajos flujos, circuitos cerrados y flujo continuo sin tener que cambiar de máquina. Además reflejaban una eficacia del 100% con cualquiera de los flujos de gas fresco usados; con una compliance interna mínima que conlleva una correlación del volumen corriente pautado y entregado adecuada. Además de un bajo volumen interno que determina una constante de tiempo más baja que hace que el patrón ventilatorio programado no se vea alterado por un volumen adicional que influiría tanto en el flujo como en el tiempo inspiratorio, y por ende en la redistribución del gas pulmonar.

Los animales fueron premedicados con midazolam 0,2 mg/kg y preoxigenados con O<sub>2</sub> FiO<sub>2</sub> 1 mediante una mascarilla facial durante cinco minutos con un flujo de gas fresco de 3-5 l/min. La anestesia se indujo con sevoflurano al 5% (posteriormente 1,5 CAM<sup>2</sup> y para BIS 40-60). Se canalizaba la vena marginal de la oreja. Se administró fentanilo 2 µg/kg y cisatracurio

0,1 mg/kg iv y luego perfusión de cisatracurio (0,09 mg/Kg/h) y remifentanilo (0,2µg/Kg/min). Durante la cirugía se mantuvo una infusión continua de Ringer-Lactato a 10 ml/Kg/h conectado a un calentador de fluidos.

Se intubó la tráquea con tubo endotraqueal 3,5-4,5 con neumotaponamiento y se conectó al respirador para ventilación mecánica. Para la programación de la modalidad ventilatoria neonatal (flujo continuo) se seleccionó una FiO<sub>2</sub> 0,5 con aire, la frecuencia respiratoria (FR) de 35 y una relación I:E de 1:1, volumen corriente (Vt) de 8 ml/kg (según el nomograma de Radford<sup>3</sup>). Con estos dos parámetros se calculó el volumen minuto (VM) y se estableció un flujo de gas fresco el doble del volumen minuto. Se administró presión positiva telespiratoria de 5 cm H<sub>2</sub>O.

Se monitorizó continuamente la temperatura, ECG, BIS, TOF, saturación de oxígeno, presión arterial sistólica, media y diastólica. Se registraron los parámetros de concentración inspirada y telespiratoria de sevoflurano, de CO<sub>2</sub> y de O<sub>2</sub> (Dash 4000, Modulo RAC 2A, General Electric Medical System, Milwaukee, WI, EEUU).

## Bibliografía

- 1 Company R, García V, López F. Análisis funcional de un nuevo sistema de anestesia: Temel Supra. Rev Esp Anesthesiol Reanim. 2004;51:299-308.
- 2 Steffey EP. Inhalation Anesthetics. In: Thurmon JC, Tranquilli WJ, Benson GJ, eds. Veterinary Anesthesia. 3ed. Baltimore: Williams & Wilkins, 1996; 314.
- 3 Radford EP, Ferris BG, Kriete BC. Clinical use of a nomogram to estimate proper ventilation during artificial respiration. N Engl J Med. 1954;25; 251(22):877-84.
